# Supplementary material for: Real-World Clinical and Economic Outcomes of Liraglutide Versus Sitagliptin in Patients with Type 2 Diabetes Mellitus in the United States
Source: Springer Nature journal article supplement (doi:10.1007/s13300-014-0084-9), 2014-09-25
Supplement: MOESM1 [file 9263266]

**Appendix Table A1: Regression on Clinical Outcomes**

| Dependent Variable        | Absolute Change in A1C from Baseline to Follow-up* |                 | A1C ≤6.5% at Follow-up** |                 | A1C <7% at Follow-up** |                 |
|---------------------------|----------------------------------------------------|-----------------|--------------------------|-----------------|------------------------|-----------------|
|                           | Direct Impact on A1C Change                        | <i>p</i> -value | OR                       | <i>p</i> -value | OR                     | <i>p</i> -value |
| <b>Index medication</b>   |                                                    |                 |                          |                 |                        |                 |
| Liraglutide               | -0.31                                              | <0.01           | 2.00                     | <0.01           | 1.55                   | <0.01           |
| Sitagliptin (reference)   |                                                    |                 |                          |                 |                        |                 |
| <b>Demographics</b>       |                                                    |                 |                          |                 |                        |                 |
| Age group:                |                                                    |                 |                          |                 |                        |                 |
| 18–44 (reference)         |                                                    |                 |                          |                 |                        |                 |
| 45–54                     | -0.20                                              | 0.05            | 1.04                     | 0.88            | 1.43                   | 0.12            |
| 55–64                     | -0.33                                              | <0.01           | 1.21                     | 0.41            | 1.36                   | 0.15            |
| 65–74                     | -0.49                                              | <0.01           | 1.01                     | 0.97            | 1.58                   | 0.09            |
| 75+                       | -0.19                                              | 0.25            | .87                      | 0.71            | 0.81                   | 0.53            |
| Gender:                   |                                                    |                 |                          |                 |                        |                 |
| Male (reference)          |                                                    |                 |                          |                 |                        |                 |
| Female                    | -0.08                                              | 0.19            | 1.22                     | 0.15            | 1.04                   | 0.74            |
| Plan types:               |                                                    |                 |                          |                 |                        |                 |
| Comprehensive (reference) |                                                    |                 |                          |                 |                        |                 |
| All other plan types      | 0.86                                               | 0.01            | 3.71                     | 0.08            | 0.19                   | 0.05            |
| Region:                   |                                                    |                 |                          |                 |                        |                 |
| Northeast (reference)     |                                                    |                 |                          |                 |                        |                 |
| North Central             | -0.06                                              | 0.58            | 1.04                     | 0.87            | 1.27                   | 0.33            |
| South                     | 0.04                                               | 0.67            | 0.84                     | 0.37            | 1.18                   | 0.34            |
| West                      | 0.09                                               | 0.31            | 0.76                     | 0.22            | 1.05                   | 0.81            |
| Metropolis area           | -0.12                                              | 0.33            | 0.93                     | 0.79            | 1.58                   | 0.08            |
| Index year                |                                                    |                 |                          |                 |                        |                 |
| 2010 (reference)          |                                                    |                 |                          |                 |                        |                 |
| 2011                      | 0.08                                               | 0.25            | 0.83                     | 0.21            | 0.97                   | 0.83            |

| Dependent Variable                                | Absolute Change in A1C from Baseline to Follow-up* |         | A1C ≤6.5% at Follow-up** |         | A1C <7% at Follow-up** |         |
|---------------------------------------------------|----------------------------------------------------|---------|--------------------------|---------|------------------------|---------|
|                                                   | Direct Impact on A1C Change                        | p-value | OR                       | p-value | OR                     | p-value |
| 2012                                              | 0.04                                               | 0.66    | 0.75                     | 0.15    | 0.84                   | 0.34    |
| <b>Clinical characteristics in washout period</b> |                                                    |         |                          |         |                        |         |
| Provider for index medication                     |                                                    |         |                          |         |                        |         |
| Primary care physician (reference)                |                                                    |         |                          |         |                        |         |
| Endocrinologists                                  | -0.46                                              | <0.01   | 2.28                     | <0.01   | 2.88                   | <0.01   |
| Other                                             | -0.01                                              | 0.84    | 1.05                     | 0.74    | 1.01                   | 0.91    |
| Charlson comorbidity index                        | 0.00                                               | 0.98    | 0.96                     | 0.46    | 1.05                   | 0.35    |
| Comorbidities                                     |                                                    |         |                          |         |                        |         |
| Retinopathy                                       | 0.14                                               | 0.28    | 0.91                     | 0.75    | 0.85                   | 0.57    |
| Nephropathy                                       | 0.02                                               | 0.88    | 1.17                     | 0.57    | 0.91                   | 0.72    |
| Neuropathy                                        | 0.08                                               | 0.50    | 1.08                     | 0.78    | 0.72                   | 0.19    |
| Cerebrovascular                                   | -0.19                                              | 0.38    | 2.25                     | 0.08    | 1.12                   | 0.81    |
| Cardiovascular                                    | -0.01                                              | 0.93    | 1.33                     | 0.19    | 1.24                   | 0.28    |
| Peripheral vascular disease                       | -0.34                                              | 0.06    | 1.38                     | 0.43    | 1.96                   | 0.08    |
| Depression                                        | -0.10                                              | 0.60    | 1.05                     | 0.91    | 0.95                   | 0.89    |
| Obesity                                           | 0.09                                               | 0.70    | 1.40                     | 0.52    | 0.65                   | 0.39    |
| Hypertension                                      | -0.12                                              | 0.08    | 1.29                     | 0.17    | 1.11                   | 0.43    |
| Hyperlipidemia                                    | -0.09                                              | 0.25    | 1.07                     | 0.66    | 1.06                   | 0.71    |
| Use of anti-diabetic medications                  |                                                    |         |                          |         |                        |         |
| Metformin                                         | 0.08                                               | 0.21    | 0.82                     | 0.16    | 0.83                   | 0.14    |
| Sulfonylurea                                      | 0.47                                               | <0.01   | 0.38                     | <0.01   | 0.42                   | <0.01   |
| Thiazolidione                                     | 0.20                                               | 0.01    | 0.60                     | <0.01   | 0.72                   | 0.04    |
| Other OADs                                        | -0.07                                              | 0.73    | 2.19                     | 0.64    | 1.35                   | 0.47    |
| Insulin                                           | 0.43                                               | <0.01   | 0.34                     | <0.01   | 0.49                   | <0.01   |
| Baseline A1C                                      | -0.60                                              | <0.01   | 0.56                     | <0.01   | 0.55                   | <0.01   |
| Occurrence of severe hypoglycemia                 | -0.26                                              | 0.49    | 1.59                     | 0.62    | 1.13                   | 0.88    |

| Dependent Variable                                | Absolute Change in A1C from Baseline to Follow-up* |                | A1C ≤6.5% at Follow-up** |                | A1C <7% at Follow-up** |                |
|---------------------------------------------------|----------------------------------------------------|----------------|--------------------------|----------------|------------------------|----------------|
|                                                   | <i>Direct Impact on A1C Change</i>                 | <i>p-value</i> | <i>OR</i>                | <i>p-value</i> | <i>OR</i>              | <i>p-value</i> |
| <b>Economic characteristics in washout period</b> |                                                    |                |                          |                |                        |                |
| Log of total diabetes-related costs               | 0.05                                               | 0.01           | 0.92                     | 0.017          | 0.88                   | 0.01           |

\*Generalized linear model with normal distribution was used.

\*\*Logistic regression was used.

Data source: 2009–2012 Truven MarketScan Commercial Insurance and Medicare Supplemental Insurance databases with linked lab data

Coef, coefficient; OAD, oral antidiabetic drug; OR: odds ratio

**Appendix Table A2: Regression on Economic Outcomes**

| Dependent Variable        | Total Diabetes-related Costs during Follow-up* |                | Diabetes-related Medical Costs during Follow-up* |                | Pharmacy Costs of Anti-diabetics during Follow-up* |                |
|---------------------------|------------------------------------------------|----------------|--------------------------------------------------|----------------|----------------------------------------------------|----------------|
|                           | <i>Cost Ratio</i>                              | <i>p-value</i> | <i>Cost Ratio</i>                                | <i>p-value</i> | <i>Cost Ratio</i>                                  | <i>p-value</i> |
| <b>Index medication</b>   |                                                |                |                                                  |                |                                                    |                |
| Liraglutide               | 0.89                                           | 0.29           | 0.56                                             | 0.01           | 1.35                                               | <0.01          |
| Sitagliptin (reference)   |                                                |                |                                                  |                |                                                    |                |
| <b>Demographics</b>       |                                                |                |                                                  |                |                                                    |                |
| Age group:                |                                                |                |                                                  |                |                                                    |                |
| 18–44 (reference)         |                                                |                |                                                  |                |                                                    |                |
| 45–54                     | 1.02                                           | 0.91           | 1.07                                             | 0.82           | 1.04                                               | 0.48           |
| 55–64                     | 1.10                                           | 0.58           | 1.21                                             | 0.46           | 1.07                                               | 0.24           |
| 65–74                     | 1.10                                           | 0.64           | 1.25                                             | 0.51           | 1.09                                               | 0.19           |
| 75+                       | 1.06                                           | 0.80           | 0.91                                             | 0.81           | 1.00                                               | 0.98           |
| Gender:                   |                                                |                |                                                  |                |                                                    |                |
| Male (reference)          |                                                |                |                                                  |                |                                                    |                |
| Female                    | 0.95                                           | 0.55           | 1.06                                             | 0.70           | 0.89                                               | <0.01          |
| Plan types:               |                                                |                |                                                  |                |                                                    |                |
| Comprehensive (reference) |                                                |                |                                                  |                |                                                    |                |
| All other plan types      | 0.64                                           | 0.35           | 0.45                                             | 0.29           | 0.95                                               | 0.66           |
| Region:                   |                                                |                |                                                  |                |                                                    |                |
| Northeast (reference)     |                                                |                |                                                  |                |                                                    |                |
| North Central             | 0.95                                           | 0.79           | 0.89                                             | 0.74           | 0.86                                               | 0.01           |
| South                     | 0.83                                           | 0.12           | 1.04                                             | 0.89           | 0.71                                               | <0.01          |
| West                      | 1.03                                           | 0.81           | 1.33                                             | 0.26           | 0.90                                               | 0.01           |
| Metropolis area           | 1.19                                           | 0.17           | 1.41                                             | 0.24           | 0.99                                               | 0.88           |
| Index year                |                                                |                |                                                  |                |                                                    |                |
| 2010 (reference)          |                                                |                |                                                  |                |                                                    |                |
| 2011                      | 1.22                                           | 0.08           | 1.44                                             | 0.07           | 1.06                                               | 0.10           |
| 2012                      | 0.93                                           | 0.50           | 0.85                                             | 0.48           | 1.11                                               | 0.01           |

| Dependent Variable                                | Total Diabetes-related Costs during Follow-up* |                | Diabetes-related Medical Costs during Follow-up* |                | Pharmacy Costs of Anti-diabetics during Follow-up* |                |
|---------------------------------------------------|------------------------------------------------|----------------|--------------------------------------------------|----------------|----------------------------------------------------|----------------|
|                                                   | <i>Cost Ratio</i>                              | <i>p-value</i> | <i>Cost Ratio</i>                                | <i>p-value</i> | <i>Cost Ratio</i>                                  | <i>p-value</i> |
| <b>Clinical characteristics in washout period</b> |                                                |                |                                                  |                |                                                    |                |
| Provider for index medication                     |                                                |                |                                                  |                |                                                    |                |
| Primary care physician (reference)                |                                                |                |                                                  |                |                                                    |                |
| Endocrinologists                                  | 1.45                                           | 0.12           | 1.82                                             | 0.09           | 0.93                                               | 0.33           |
| Other                                             | 1.08                                           | 0.41           | 1.03                                             | 0.86           | 1.06                                               | 0.09           |
| Charlson comorbidity index                        | 1.03                                           | 0.39           | 1.11                                             | 0.11           | 1.00                                               | 0.72           |
| Comorbidities                                     |                                                |                |                                                  |                |                                                    |                |
| Retinopathy                                       | 1.07                                           | 0.71           | 1.25                                             | 0.52           | 0.98                                               | 0.73           |
| Nephropathy                                       | 0.84                                           | 0.18           | 0.67                                             | 0.13           | 0.99                                               | 0.88           |
| Neuropathy                                        | 1.11                                           | 0.51           | 1.46                                             | 0.22           | 0.99                                               | 0.83           |
| Cerebrovascular                                   | 1.18                                           | 0.64           | 0.96                                             | 0.94           | 1.01                                               | 0.92           |
| Cardiovascular                                    | 1.09                                           | 0.47           | 1.22                                             | 0.36           | 1.01                                               | 0.91           |
| Peripheral vascular disease                       | 1.42                                           | 0.09           | 2.36                                             | 0.02           | 0.91                                               | 0.23           |
| Depression                                        | 1.10                                           | 0.64           | 1.07                                             | 0.85           | 0.99                                               | 0.90           |
| Obesity                                           | 2.38                                           | 0.02           | 4.09                                             | 0.01           | 1.20                                               | 0.18           |
| Hypertension                                      | 0.93                                           | 0.44           | 0.81                                             | 0.23           | 1.06                                               | 0.07           |
| Hyperlipidemia                                    | 1.08                                           | 0.49           | 1.20                                             | 0.34           | 0.95                                               | 0.16           |
| Use of anti-diabetic medications                  |                                                |                |                                                  |                |                                                    |                |
| Metformin                                         | 0.94                                           | 0.46           | 0.78                                             | 0.11           | 1.05                                               | 0.10           |
| Sulfonylurea                                      | 1.23                                           | 0.03           | 1.72                                             | 0.00           | 1.01                                               | 0.67           |
| Thiazolidione                                     | 0.87                                           | 0.17           | 0.59                                             | 0.00           | 1.20                                               | <0.01          |
| Other OADs                                        | 0.94                                           | 0.68           | 0.51                                             | 0.02           | 1.33                                               | <0.01          |
| Insulin                                           | 1.18                                           | 0.10           | 1.00                                             | 0.99           | 1.41                                               | <0.01          |
| Baseline A1C                                      | 0.95                                           | 0.06           | 0.89                                             | 0.01           | 1.03                                               | <0.01          |
| Occurrence of severe hypoglycemia                 | 1.90                                           | 0.22           | 2.21                                             | 0.31           | 0.87                                               | 0.40           |
| <b>Economic characteristics in washout period</b> |                                                |                |                                                  |                |                                                    |                |
| Log of total diabetes-related costs               | 1.03                                           | 0.47           | 0.98                                             | 0.72           | 1.06                                               | <0.01          |

\*Generalized linear model with gamma distribution and log link was used.

Data source: 2009–2012 Truven MarketScan Commercial Insurance and Medicare Supplemental Insurance databases with linked lab data

Coef, coefficient; CR, cost ratio; OAD, oral antidiabetic drug
