# Supplementary material for: Real-World Clinical and Economic Outcomes of Liraglutide Versus Sitagliptin in Patients with Type 2 Diabetes Mellitus in the United States
Source: Springer Nature journal article supplement (doi:10.1007/s13300-014-0084-9), 2014-09-25
Supplement: MOESM2 [file 9263266]

- This retrospective cohort study compared the clinical effectiveness of liraglutide versus sitagliptin and assessed the associated economic outcomes at 6 months of follow-up among patients with type 2 diabetes mellitus (T2DM) treated in real-world practice in the United States.
- Adults patients ( $\geq 18$  years old) with continuous use of liraglutide or sitagliptin for  $\geq 3$  months were included ( $N = 1,465$ ) and assessed over 6 months.
- Liraglutide patients had a 0.31%-point greater reduction in A1C (0.95% vs. 0.63%-point;  $P < 0.01$ ) at 6 months of follow-up than sitagliptin patients, and were more likely to reach glycated hemoglobin (A1C) targets of  $\leq 6.5\%$  (odds ratio [OR]: 2.00;  $P < 0.01$ ) and  $< 7\%$  (OR: 1.55;  $P < 0.01$ ).
- Liraglutide patients had \$994 lower mean diabetes-related medical costs per patient during follow-up (\$1,241 vs. \$2,235;  $P < 0.01$ ), but \$544 higher diabetes-related pharmacy costs (\$2,100 vs. \$1,556;  $P < 0.01$ ), leading to no difference in the total diabetes-related costs between the two cohorts.
- In real-world clinical practice, liraglutide showed greater improvement in glycemic control and similar total diabetes-related costs compared to sitagliptin among adult patients with T2DM.

This summary slide represents the opinions of the authors. Sponsorship for this study was funded by Novo Nordisk Inc., Princeton, NJ, USA. For a full list of acknowledgments and conflicts of interest for all authors of this article, please see the full text online. Copyright © The Author(s) 2014. Creative Commons Attribution Noncommercial License (CC BY-NC).
